# Supplementary material for: Kritisch: Notfall in der pädiatrischen Onkologie
Source: Springer Nature journal article supplement (doi:10.1007/s41906-021-1193-5), 2021-12-15
Supplement: MOESM1 [file 19967956]

## Literatur

### zum Beitrag „Kritisch: Notfall in der pädiatrischen Onkologie“ von Maria Flury

*Pflegezeitschrift (75) 1-2/2022, S. 24-26*

Benner, P., 1984. From Novice to Expert. Addison-Wesley, California.

Landier W, Ahern J, Barakat LP, Bhatia S, Bingen KM, Bondurant PG. et al. (2016). Patient/Family Education for Newly Diagnosed Pediatric Oncology Patients. *J Pediatr Oncol Nurs* Nov/Dec 2016;33(6):422-431. doi: 10.1177/1043454216655983.

Flury M, Caflisch U, Ullmann-Bremi A, Spichiger E.(2011). Experiences of parents with caring for their child after a cancer diagnosis. *J Pediatr Oncol Nurs*. 2011 May-Jun; 28(3):143-53. doi: 10.1177/1043454210378015.

Inaba,H., Pei, D., Wolf, J., Howard,S. C., Hayden,R. T., Go, M. (2016).Infection-related complications during treatment for childhood acute lymphoblastic leukemia. *Annals of Oncology* 28: 386–392, 2017 doi:10.1093/annonc/mdw557

Sheldon,G. , Heaton, P.A., Palmer, S., Paul, S.P. (2018) Nursing management of paediatric asthma in emergency departments. *Emerg Nurse* 26 (4), 32-42

Withycombe, J.S., Haugen, M., Zupanec, S., Macpherson, C.F., Landier, W. (2019). Consensus Recommendations from the Children`s Oncology Group Nursing Discipline`s State of the Science Symposium: Symptom Assessment during Childhood Cancer Treatment. *Journal of Pediatric Oncology Nursing*, 36 (4), 294-299

Lekshminarayanan,A., Bhatt,P., Linga, V.G., Chaudhari,R., Zhu, B., Dave,M. et.al. (2018). National Trends in Hospitalization for Fever and Neutropenia in Children with Cancer, 2007-2014. *The Journal of Pediatrics*. 202:231-7.
